# Supplementary material for: QTL meta-analysis in Arabidopsis reveals an interaction between leaf senescence and resource allocation to seeds
Source: PubMed Central journal article supplement (PMC4106442; doi:10.1093/jxb/eru125), 2014-04-01
Supplement: supp_eru125_jexbot116327_file001.pdf [file supp_eru125_jexbot116327_file001.pdf]

**Supplemental TableS1: List of QTL detected in the three RIL populations.** QTL name refers to the population using name of the parent different from Col-0, the trait, the chromosome where it is localized and if several QTL for one trait on the same chromosome, the number as such: Parent\_trait\_chromosome\_number. For each QTL the chromosome, the position (corresponding to the LOD score peak) and its confidence interval (CI, left and right borders) are indicated. The additive effect represents the mean effect on the trait of the replacement of two Col-0 alleles by two Ct-1, Cvi-0 or Bur-0 alleles at the QTL. R<sup>2</sup> represents the proportion of phenotypic variance of the trait explained by the QTL.

| QTL             | Trait           | Population  | Chromosome | Position (cM) | CI (cM) left border | CI (cM) right border | R <sup>2</sup> (%) |
|-----------------|-----------------|-------------|------------|---------------|---------------------|----------------------|--------------------|
| Cvi_FT_1        | FT              | Cvi-0xCol-0 | 1          | 0.0           | 0.0                 | 6.0                  | 43                 |
| Cvi_RV_1.1      | RV              | Cvi-0xCol-0 | 1          | 0.0           | 0.0                 | 6.0                  | 39                 |
| Cvi_Rosette_1.1 | Rosette         | Cvi-0xCol-0 | 1          | 0.0           | 0.0                 | 6.0                  | 15                 |
| Cvi_Seeds_1     | Seeds           | Cvi-0xCol-0 | 1          | 0.0           | 0.0                 | 6.0                  | 28                 |
| Cvi_Stem_1      | Stem            | Cvi-0xCol-0 | 1          | 0.0           | 0.0                 | 6.0                  | 48                 |
| Ct_HI_1.1       | HI              | Ct-1xCol-0  | 1          | 10.2          | 0.0                 | 31.6                 | 8                  |
| Ct_Seed%N_1     | Seed N%         | Ct-1xCol-0  | 1          | 10.2          | 0.0                 | 36.7                 | 12                 |
| Cvi_HI_1        | HI              | Cvi-0xCol-0 | 1          | 10.9          | 0.0                 | 17.9                 | 19                 |
| Bur_Seed%N_1    | Seed N%         | Bur-0xCol-0 | 1          | 17.8          | 8.3                 | 34.6                 | 9                  |
| Ct_Rosette_1.1  | Rosette         | Ct-1xCol-0  | 1          | 21.8          | 0.0                 | 31.6                 | 16                 |
| Ct_Seeds_1.1    | Seeds           | Ct-1xCol-0  | 1          | 21.8          | 0.0                 | 82.9                 | 8                  |
| Ct_Stem_1.1     | Stem            | Ct-1xCol-0  | 1          | 21.8          | 0.0                 | 31.6                 | 13                 |
| Cvi_Senes_1     | Leaf senescence | Cvi-0xCol-0 | 1          | 24.6          | 17.9                | 37.5                 | 15                 |
| Cvi_Seed%C_1.1  | Seed C%         | Cvi-0xCol-0 | 1          | 24.6          | 17.9                | 37.5                 | 14                 |
| Cvi_Seed%N_1    | Seed N%         | Cvi-0xCol-0 | 1          | 24.6          | 6.0                 | 37.5                 | 24                 |
| Ct_Senes_1.1    | Leaf senescence | Ct-1xCol-0  | 1          | 31.6          | 15.4                | 36.7                 | 10                 |
| Ct_Seed%C_1     | Seed C%         | Ct-1xCol-0  | 1          | 31.6          | 10.2                | 36.7                 | 11                 |
| Bur_FT_1        | FT              | Bur-0xCol-0 | 1          | 42.0          | 34.6                | 50.8                 | 32                 |
| Bur_Senes_1     | Leaf senescence | Bur-0xCol-0 | 1          | 42.0          | 34.6                | 50.8                 | 28                 |
| Bur_RV_1        | RV              | Bur-0xCol-0 | 1          | 42.0          | 34.6                | 50.8                 | 27                 |
| Bur_Rosette_1   | Rosette         | Bur-0xCol-0 | 1          | 42.0          | 34.6                | 50.8                 | 16                 |
| Bur_TGW_1       | TGW             | Bur-0xCol-0 | 1          | 42.0          | 34.6                | 50.8                 | 38                 |
| Cvi_Rosette_1.2 | Rosette         | Cvi-0xCol-0 | 1          | 49.1          | 24.6                | 82.2                 | 7                  |
| Cvi_RV_1.2      | RV              | Cvi-0xCol-0 | 1          | 64.7          | 54.4                | 71.9                 | 12                 |
| Ct_HI_1.2       | HI              | Ct-1xCol-0  | 1          | 69.2          | 61.3                | 73.9                 | 14                 |
| Ct_RV_1         | RV              | Ct-1xCol-0  | 1          | 82.9          | 73.9                | 102.2                | 12                 |
| Ct_Rosette_1.2  | Rosette         | Ct-1xCol-0  | 1          | 82.9          | 73.9                | 89.3                 | 14                 |
| Ct_Seeds_1.2    | Seeds           | Ct-1xCol-0  | 1          | 102.2         | 92.9                | 112.7                | 23                 |
| Ct_Stem_1.2     | Stem            | Ct-1xCol-0  | 1          | 102.2         | 92.9                | 112.7                | 7                  |
| Ct_Senes_1.2    | Leaf senescence | Ct-1xCol-0  | 1          | 104.9         | 92.9                | 112.7                | 12                 |
| Cvi_Seed%C_1.2  | Seed C%         | Cvi-0xCol-0 | 1          | 130.6         | 71.9                | 138.1                | 9                  |
| Ct_RV_2         | RV              | Ct-1xCol-0  | 2          | 22.4          | 9.8                 | 47.7                 | 14                 |
| Bur_RV_2        | RV              | Bur-0xCol-0 | 2          | 28.5          | 9.3                 | 55.8                 | 7                  |
| Ct_TGW_2        | TGW             | Ct-1xCol-0  | 2          | 47.7          | 22.4                | 60.9                 | 7                  |
| Ct_Seed%C_2     | Seed C%         | Ct-1xCol-0  | 2          | 66.9          | 47.7                | 70.8                 | 17                 |
| Ct_Seeds_2      | Seeds           | Ct-1xCol-0  | 2          | 66.9          | 60.9                | 70.8                 | 11                 |
| Ct_Senes_2      | Leaf senescence | Ct-1xCol-0  | 2          | 70.8          | 37.9                | 70.8                 | 10                 |
| Ct_Rosette_2    | Rosette         | Ct-1xCol-0  | 2          | 70.8          | 60.9                | 70.8                 | 15                 |
| Ct_Seed%N_2     | Seed N%         | Ct-1xCol-0  | 2          | 70.8          | 47.7                | 70.8                 | 10                 |
| Ct_Stem_2       | Stem            | Ct-1xCol-0  | 2          | 70.8          | 60.9                | 70.8                 | 12                 |
| Cvi_Seeds_2     | Seeds           | Cvi-0xCol-0 | 2          | 80.1          | 77.4                | 86.9                 | 34                 |
| Cvi_Stem_2      | Stem            | Cvi-0xCol-0 | 2          | 80.1          | 77.4                | 86.9                 | 28                 |
| Cvi_HI_2        | HI              | Cvi-0xCol-0 | 2          | 86.9          | 77.4                | 86.9                 | 9                  |
| Cvi_Rosette_2   | Rosette         | Cvi-0xCol-0 | 2          | 86.9          | 77.4                | 86.9                 | 14                 |
| Cvi_Seed%C_2    | Seed C%         | Cvi-0xCol-0 | 2          | 86.9          | 77.4                | 86.9                 | 31                 |
| Cvi_Seed%N_2    | Seed N%         | Cvi-0xCol-0 | 2          | 86.9          | 77.4                | 86.9                 | 41                 |
| Bur_Seed%N_3    | Seed N%         | Bur-0xCol-0 | 3          | 5.7           | 0.0                 | 14.5                 | 19                 |
| Ct_Seed%C_3.1   | Seed C%         | Ct-1xCol-0  | 3          | 6.0           | 0.0                 | 15.8                 | 17                 |
| Ct_Seed%N_3.1   | Seed N%         | Ct-1xCol-0  | 3          | 6.0           | 0.0                 | 15.8                 | 19                 |
| Ct_Seeds_3      | Seeds           | Ct-1xCol-0  | 3          | 6.0           | 0.0                 | 19.6                 | 9                  |
| Bur_Seed%C_3.1  | Seed C%         | Bur-0xCol-0 | 3          | 8.0           | 0.0                 | 11.1                 | 20                 |
| Cvi_Seed%C_3    | Seed C%         | Cvi-0xCol-0 | 3          | 18.5          | 14.8                | 24.2                 | 13                 |
| Cvi_Seed%N_3    | Seed N%         | Cvi-0xCol-0 | 3          | 18.9          | 0.0                 | 30.4                 | 14                 |
| Cvi_Stem_3.1    | Stem            | Cvi-0xCol-0 | 3          | 30.4          | 14.8                | 40.1                 | 7                  |
| Bur_Seed%C_3.2  | Seed C%         | Bur-0xCol-0 | 3          | 54.2          | 42.0                | 65.5                 | 20                 |
| Ct_Rosette_3    | Rosette         | Ct-1xCol-0  | 3          | 57.3          | 48.9                | 70.8                 | 17                 |
| Ct_RV_3         | RV              | Ct-1xCol-0  | 3          | 63.6          | 25.9                | 70.9                 | 9                  |
| Ct_Seed%C_3.2   | Seed C%         | Ct-1xCol-0  | 3          | 63.6          | 57.3                | 70.9                 | 24                 |
| Ct_Seed%N_3.2   | Seed N%         | Ct-1xCol-0  | 3          | 63.6          | 48.9                | 74.2                 | 14                 |
| Cvi_Seeds_3     | Seeds           | Cvi-0xCol-0 | 3          | 90.5          | 68.6                | 90.5                 | 9                  |
| Cvi_Stem_3.2    | Stem            | Cvi-0xCol-0 | 3          | 90.5          | 75.8                | 90.5                 | 11                 |
| Ct_Seed%N_4.1   | Seed N%         | Ct-1xCol-0  | 4          | 4.1           | 0.0                 | 12.4                 | 7                  |
| Cvi_Seed%N_4    | Seed N%         | Cvi-0xCol-0 | 4          | 19.1          | 6.5                 | 28.6                 | 11                 |
| Ct_Seed%C_4.1   | Seed C%         | Ct-1xCol-0  | 4          | 20.1          | 4.1                 | 46.0                 | 15                 |
| Bur_RV_4        | RV              | Bur-0xCol-0 | 4          | 25.6          | 0.0                 | 40.9                 | 7                  |
| Ct_Senes_4      | Leaf senescence | Ct-1xCol-0  | 4          | 31.6          | 31.3                | 36.7                 | 29                 |
| Bur_Rosette_4   | Rosette         | Bur-0xCol-0 | 4          | 35.7          | 0.0                 | 40.9                 | 8                  |
| Ct_Rosette_4    | Rosette         | Ct-1xCol-0  | 4          | 36.7          | 31.6                | 46.0                 | 31                 |
| Ct_Seed%N_4.2   | Seed N%         | Ct-1xCol-0  | 4          | 36.7          | 31.6                | 46.0                 | 31                 |
| Ct_Seeds_4      | Seeds           | Ct-1xCol-0  | 4          | 36.7          | 31.3                | 46.0                 | 27                 |

|               |                 |             |   |       |       |       |    |
|---------------|-----------------|-------------|---|-------|-------|-------|----|
| Ct_Stem_4     | Stem            | Ct-1xCol-0  | 4 | 36.7  | 31.6  | 46.0  | 27 |
| Ct_TGW_4      | TGW             | Ct-1xCol-0  | 4 | 36.7  | 28.1  | 52.2  | 8  |
| Bur_TGW_4     | TGW             | Bur-0xCol-0 | 4 | 38.7  | 30.9  | 40.9  | 27 |
| Cvi_Senes_4   | Leaf senescence | Cvi-0xCol-0 | 4 | 43.9  | 40.0  | 51.3  | 25 |
| Ct_HI_4       | HI              | Ct-1xCol-0  | 4 | 52.2  | 31.3  | 62.6  | 7  |
| Ct_Seed%C_4.2 | Seed C%         | Ct-1xCol-0  | 4 | 52.2  | 46.0  | 56.8  | 12 |
| Ct_Seed%N_4.3 | Seed N%         | Ct-1xCol-0  | 4 | 56.8  | 52.2  | 62.6  | 8  |
| Ct_FT_5.1     | FT              | Ct-1xCol-0  | 5 | 4.5   | 0.0   | 98.1  | 7  |
| Bur_Rosette_5 | Rosette         | Bur-0xCol-0 | 5 | 4.6   | 0.0   | 9.1   | 19 |
| Bur_FT_5      | FT              | Bur-0xCol-0 | 5 | 9.1   | 6.1   | 11.5  | 33 |
| Bur_HI_5      | HI              | Bur-0xCol-0 | 5 | 9.1   | 6.1   | 11.5  | 54 |
| Bur_Seed%C_5  | Seed C%         | Bur-0xCol-0 | 5 | 9.1   | 6.1   | 11.5  | 35 |
| Bur_Seed%N_5  | Seed N%         | Bur-0xCol-0 | 5 | 9.1   | 4.6   | 11.5  | 14 |
| Bur_Seeds_5   | Seeds           | Bur-0xCol-0 | 5 | 9.1   | 6.1   | 11.5  | 49 |
| Bur_Senes_5   | Leaf senescence | Bur-0xCol-0 | 5 | 11.5  | 6.1   | 20.4  | 11 |
| Ct_HI_5       | HI              | Ct-1xCol-0  | 5 | 13.3  | 8.9   | 17.4  | 29 |
| Ct_Seed%C_5   | Seed C%         | Ct-1xCol-0  | 5 | 13.3  | 8.9   | 17.4  | 26 |
| Ct_Seed%N_5   | Seed N%         | Ct-1xCol-0  | 5 | 13.3  | 8.9   | 17.4  | 18 |
| Ct_Seeds_5    | Seeds           | Ct-1xCol-0  | 5 | 13.3  | 8.9   | 17.4  | 17 |
| Ct_TGW_5.1    | TGW             | Ct-1xCol-0  | 5 | 17.4  | 4.5   | 23.9  | 9  |
| Ct_RV_5.1     | RV              | Ct-1xCol-0  | 5 | 23.9  | 17.4  | 32.1  | 11 |
| Cvi_Stem_5    | Stem            | Cvi-0xCol-0 | 5 | 28.6  | 18.1  | 96.5  | 6  |
| Ct_TGW_5.2    | TGW             | Ct-1xCol-0  | 5 | 82.5  | 75.4  | 98.1  | 8  |
| Ct_Senes_5    | Leaf senescence | Ct-1xCol-0  | 5 | 88.1  | 80.3  | 98.1  | 29 |
| Ct_RV_5.2     | RV              | Ct-1xCol-0  | 5 | 88.1  | 82.5  | 98.1  | 37 |
| Cvi_Seed%C_5  | Seed C%         | Cvi-0xCol-0 | 5 | 91.6  | 85.1  | 96.5  | 9  |
| Ct_FT_5.2     | FT              | Ct-1xCol-0  | 5 | 98.1  | 88.1  | 98.1  | 22 |
| Ct_Rosette_5  | Rosette         | Ct-1xCol-0  | 5 | 98.1  | 82.5  | 98.1  | 22 |
| Cvi_TGW_5     | TGW             | Cvi-0xCol-0 | 5 | 106.5 | 91.6  | 112.8 | 7  |
| Cvi_FT_5      | FT              | Cvi-0xCol-0 | 5 | 112.8 | 106.5 | 112.8 | 11 |
| Cvi_RV_5      | RV              | Cvi-0xCol-0 | 5 | 112.8 | 106.5 | 112.8 | 14 |

**Supplemental TableS2: Validation of the effects of the SG1 – metaQTL5.2 on plant biomass and seed composition using near isogenic lines carrying either Bur-0 or Col-0 alleles.** Means and SD are shown (n=12) and probability that trait values are different depending on Col-0 or Bur-0 alleles at SG1 from T-tests.

| Traits  | rHIF (allele)       |      |                     |      | T-test  |
|---------|---------------------|------|---------------------|------|---------|
|         | <i>Col-0</i> (n=12) |      | <i>Bur-0</i> (n=12) |      |         |
|         | mean                | Sdt  | mean                | Sdt  |         |
| Rosette | 110                 | 18   | 433                 | 30   | <0.0001 |
| Stem    | 908                 | 179  | 2376                | 175  | <0.0001 |
| Seeds   | 63                  | 35   | 1170                | 58   | <0.0001 |
| HI      | 8.2                 | 2    | 8.284               | 1.1  | 0.919   |
| RV      | 0.04                | 0.06 | 0.30                | 0.03 | <0.0001 |
| Seed %N | 4.39                | 0.60 | 4.78                | 2.45 | 0.003   |
| Seed %C | 54.2                | 12.4 | 49.6                | 10.4 | <0.0001 |

**Supplemental TableS3: List of candidate genes involved in senescence process, resource allocation and flowering time.** Name gene, complete name gene and ATG code are recorded from TAIR (<http://www.arabidopsis.org/index.jsp>). Gene positions are described by Chromosome, Position (the physical position on AGI map), and Marker code (estimated position onto the consensus genetic map by a homothetic projection).

| Process              | Name Gene | Complete Name gene                                     | ATG code  | Chromosome | Position | Marker code | Reference                                                                                                                                                                                                                                                                                              |
|----------------------|-----------|--------------------------------------------------------|-----------|------------|----------|-------------|--------------------------------------------------------------------------------------------------------------------------------------------------------------------------------------------------------------------------------------------------------------------------------------------------------|
| Ressource allocation | ALAA1     | ALANINE AMINOTRANSFERASE 1                             | AT1G17290 | c1         | 5922630  | c1_05922    | Shrawat AK, Carroll RT, DePauw M, Taylor GJ and Good AG. 2008. Genetic engineering of improved nitrogen use efficiency in rice by the tissue-specific expression of alanine aminotransferase. <i>Plant biotechnology journal</i> 6, 722-32.                                                            |
| Ressource allocation | AOAT1     | ALANINE-2-OXOGLUTARATE AMINOTRANSFERASE 1              | AT1G23310 | c1         | 8268416  | c1_08268    | Verslues PE, Kim Y-S and Zhu J-K. 2007. Altered ABA, proline and hydrogen peroxide in an Arabidopsis glutamate:glyoxylate aminotransferase mutant. <i>Plant Molecular Biology</i> 64, 205-17.                                                                                                          |
| Ressource allocation | AOAT2     | ALANINE-2-OXOGLUTARATE AMINOTRANSFERASE 2              | AT1G70580 | c1         | 26612719 | c1_26612    | Liepman AH and Olsen LJ. 2003. Alanine Aminotransferase Homologs Catalyze the Glutamate:Glyoxylate Aminotransferase Reaction in Peroxisomes of Arabidopsis. <i>Plant Physiology</i> 131, 215-27.                                                                                                       |
| Ressource allocation | ALAA2     | ALANINE AMINOTRANSFERASE 2                             | AT1G72330 | c1         | 27233475 | c1_27233    | Shrawat AK, Carroll RT, DePauw M, Taylor GJ and Good AG. 2008. Genetic engineering of improved nitrogen use efficiency in rice by the tissue-specific expression of alanine aminotransferase. <i>Plant biotechnology journal</i> 6, 722-32.                                                            |
| Ressource allocation | AAT       | ASPARTATE AMINOTRANSFERASE                             | AT2G22250 | c2         | 9457810  | c2_09457    | de la Torre F, Santis LD, Suárez MF, Crespillo R and Cánovas FM. 2006. Identification and functional analysis of a prokaryotic-type aspartate aminotransferase: implications for plant amino acid metabolism. <i>The Plant Journal</i> 46, 414-25.                                                     |
| Leaf senescence      | ORE7      | ORESARA 7                                              | AT1G20900 | c1         | 7272556  | c1_07272    | Lim PO, Kim Y, Breeze E et al. 2007. Overexpression of a chromatin architecture-controlling AT-hook protein extends leaf longevity and increases the post-harvest storage life of plants. <i>The Plant Journal</i> 52, 1140-53.                                                                        |
| Leaf senescence      | LHT2      | LYSINE HISTIDINE TRANSPORTER 2                         | AT1G24400 | c1         | 8651407  | c1_08651    | Hirner A, Ladwig F, Stransky H, Okumoto S, Keinath M, Harms A, Frommer WB and Koch W. 2006. Arabidopsis LHT1 is a High-Affinity Transporter for Cellular Amino Acid Uptake in Both Root Epidermis and Leaf Mesophyll. <i>The Plant Cell Online</i> 18, 1931-46.                                        |
| Leaf senescence      | ANAC016   | NAC DOMAIN CONTAINING PROTEIN 16                       | AT1G34180 | c1         | 12448726 | c1_12448    | Kim Y-S, Sakuraba Y, Han S-H, Yoo S-C and Paek N-C. 2013. Mutation of the Arabidopsis NAC016 Transcription Factor Delays Leaf Senescence. <i>Plant and Cell Physiology</i> 54, 1660-72.                                                                                                                |
| Leaf senescence      | ANAC019   | NAC DOMAIN CONTAINING PROTEIN 19                       | AT1G52890 | c1         | 19697004 | c1_19697    | Hickman R, Hill C, Penfold CA et al. 2013. A local regulatory network around three NAC transcription factors in stress responses and senescence in Arabidopsis leaves. <i>The Plant Journal</i> 75, 26-39.                                                                                             |
| Leaf senescence      | ANAC026   | ARABIDOPSIS NAC DOMAIN CONTAINING PROTEIN 29           | AT1G62700 | c1         | 23216218 | c1_23216    | Yamaguchi M, Kubo M, Fukuda H and Demura T. 2008. VASCULAR-RELATED NAC-DOMAIN7 is involved in the differentiation of all types of xylem vessels in Arabidopsis roots and shoots. <i>The Plant Journal</i> 55, 652-64.                                                                                  |
| Leaf senescence      | PAP2      | PRODUCTION OF ANTHOCYANIN PIGMENT 2                    | AT1G66390 | c1         | 24763957 | c1_24763    | Gao P, Xin Z and Zheng Z-L. 2008. The OSU1/QUAA2/TSD2-Encoded Putative Methyltransferase Is a Critical Modulator of Carbon and Nitrogen Nutrient Balance Response in Arabidopsis. <i>PLoS ONE</i> 3, e1387.                                                                                            |
| Leaf senescence      | ANAC029   | ARABIDOPSIS NAC DOMAIN CONTAINING PROTEIN 29           | AT1G69490 | c1         | 26122139 | c1_26122    | Guo Y and Gan S. 2006. AtNAP, a NAC family transcription factor, has an important role in leaf senescence. <i>The Plant Journal</i> 46, 601-12.                                                                                                                                                        |
| Leaf senescence      | MAX2      | MORE AXILLARY BRANCHES 2                               | AT2G42620 | c2         | 17756140 | c2_17756    | Shen H, Zhu L, Bu Q-Y and Huq E. 2012. MAX2 Affects Multiple Hormones to Promote Photomorphogenesis. <i>Molecular Plant</i> 5, 750-62.                                                                                                                                                                 |
| Leaf senescence      | NAC042    | NAC DOMAIN CONTAINING PROTEIN 42                       | AT2G43000 | c2         | 17880615 | c2_17880    | Wu A, Allu AD, Garapati P et al. 2012. JUNGBRUNNEN1, a Reactive Oxygen Species-Responsive NAC Transcription Factor, Regulates Longevity in Arabidopsis. <i>The Plant Cell Online</i> 24, 482-506.                                                                                                      |
| Leaf senescence      | MYB2      | MYB DOMAIN PROTEIN 2                                   | AT2G47190 | c2         | 19376202 | c2_19376    | Guo Y and Gan S. 2011. AtMYB2 Regulates Whole Plant Senescence by Inhibiting Cytokinin-Mediated Branching at Late Stages of Development in Arabidopsis. <i>Plant Physiology</i> 156, 1612-19.                                                                                                          |
| Leaf senescence      | CYP89A9   | CYTOCHROME P450, FAMILY 87, SUBFAMILY A, POLYPEPTIDE 9 | AT3G03470 | c3         | 824552   | c3_00824    | Christ B, Süssbacher I, Moser S, Bichsel N, Egert A, Müller T, Kräutler B and Hörtensteiner S. 2013. Cytochrome P450 CYP89A9 Is Involved in the Formation of Major Chlorophyll Catabolites during Leaf Senescence in Arabidopsis. <i>The Plant Cell Online</i> 25, 1868-80.                            |
| Leaf senescence      | NAC055    | NAC DOMAIN CONTAINING PROTEIN 55                       | AT3G15500 | c3         | 5234617  | c3_05234    | Hickman R, Hill C, Penfold CA et al. 2013. A local regulatory network around three NAC transcription factors in stress responses and senescence in Arabidopsis leaves. <i>The Plant Journal</i> 75, 26-39.                                                                                             |
| Leaf senescence      | ANAC059   | ARABIDOPSIS NAC DOMAIN CONTAINING PROTEIN 59           | AT3G29035 | c3         | 11033665 | c3_11033    | Kim Y-S, Sakuraba Y, Han S-H, Yoo S-C and Paek N-C. 2013. Mutation of the Arabidopsis NAC016 Transcription Factor Delays Leaf Senescence. <i>Plant and Cell Physiology</i> 54, 1660-72.                                                                                                                |
| Leaf senescence      | ACD1      | ACCELERATED CELL DEATH 1                               | AT3G44880 | c3         | 16383595 | c3_16383    | Liu F and Guo F-Q. 2013. Nitric Oxide Deficiency Accelerates Chlorophyll Breakdown and Stability Loss of Thylakoid Membranes during Dark-Induced Leaf Senescence in Arabidopsis. <i>PLoS ONE</i> 8, e56345.                                                                                            |
| Leaf senescence      | NYC1      | NON-YELLOW COLORING 1                                  | AT4G13250 | c4         | 7684234  | c4_07684    | Nakajima S, Ito H, Tanaka R and Tanaka A. 2012. Chlorophyll b reductase plays an essential role in maturation and storability of Arabidopsis seeds. <i>Plant Physiology</i> 160, 261-73.                                                                                                               |
| Leaf senescence      | MES16     | METHYL ESTERASE 16                                     | AT4G16690 | c4         | 9392147  | c4_09392    | Christ B, Schelbert S, Aubry S, Süssbacher I, Müller T, Kräutler B and Hörtensteiner S. 2012. MES16, a Member of the Methyltransferase Protein Family, Specifically Demethylates Fluorescent Chlorophyll Catabolites during Chlorophyll Breakdown in Arabidopsis. <i>Plant Physiology</i> 158, 628-41. |
| Leaf senescence      | SGR       | STAY-GREEN                                             | AT4G22920 | c4         | 12016525 | c4_12016    | Ren G, An K, Liao Y, Zhou X, Cao Y, Zhao H, Ge X and Kuai B. 2007. Identification of a Novel Chloroplast Protein AtNYE1 Regulating Chlorophyll Degradation during Leaf Senescence in Arabidopsis. <i>Plant Physiology</i> 144, 1429-41.                                                                |
| Leaf senescence      | WRKY53    |                                                        | AT4G23810 | c4         | 12392370 | c4_12392    | Koyama T, Nii H, Mitsuda N, Ohta M, Kitajima S, Ohme-Takagi M and Sato F. 2013. A regulatory cascade involving class II ETHYLENE RESPONSE FACTOR transcriptional repressors operates in the progression of leaf senescence. <i>Plant Physiology</i> 162, 991-1005.                                     |
| Leaf senescence      | ANAC072   | ARABIDOPSIS NAC DOMAIN CONTAINING PROTEIN 72           | AT4G27410 | c4         | 13707900 | c4_13707    | Hickman R, Hill C, Penfold CA et al. 2013. A local regulatory network around three NAC transcription factors in stress responses and senescence in Arabidopsis leaves. <i>The Plant Journal</i> 75, 26-39.                                                                                             |
| Leaf senescence      | SEN4      | SENESCENCE 4                                           | AT4G30270 | c4         | 14819192 | c4_14819    | Oh SA, Lee SY, Chung I, Lee C-H and Nam HG. 1996. A senescence-associated gene of Arabidopsis thaliana is distinctively regulated during natural and artificially induced leaf senescence. <i>Plant Molecular Biology</i> 30, 739-54.                                                                  |

|                 |         |                                              |           |    |          |          |                                                                                                                                                                                                                                                                                                                    |
|-----------------|---------|----------------------------------------------|-----------|----|----------|----------|--------------------------------------------------------------------------------------------------------------------------------------------------------------------------------------------------------------------------------------------------------------------------------------------------------------------|
| Leaf senescence | SARK    | SENESCENCE-ASSOCIATED RECEPTOR-LIKE KINASE   | AT4G30520 | c4 | 14908000 | c4_14908 | Xu F, Meng T, Li P, Yu Y, Cui Y, Wang Y, Gong Q and Wang NN. 2011. A Soybean Dual-Specificity Kinase, GmsSARK, and Its Arabidopsis Homolog, ATSARK, Regulate Leaf Senescence through Synergistic Actions of Auxin and Ethylene. <i>Plant Physiology</i> 157, 2131-53.                                              |
| Leaf senescence | SEN1    | ARABIDOPSIS THALIANA SENESCENCE 1            | AT4G35770 | c4 | 16944941 | c4_16944 | Fischer-Kilbienski I, Miao Y, Roitsch T, Zschiesche W, Humbeck K and Krupinska K. 2010. Nuclear targeted AtS40 modulates senescence associated gene expression in Arabidopsis thaliana during natural development and in darkness. <i>Plant Molecular Biology</i> 73, 379-90.                                      |
| Leaf senescence | RCCR    | RED CHLOROPHYLL CATABOLITE REDUCTASE         | AT4G37000 | c4 | 17442612 | c4_17442 | Sakuraba Y, Schelbert S, Park S-Y, Han S-H, Lee B-D, Andrés CB, Kessler F, Hörtensteiner S and Paek N-C. 2012. STAY-GREEN and Chlorophyll Catabolic Enzymes Interact at Light-Harvesting Complex II for Chlorophyll Detoxification during Leaf Senescence in Arabidopsis. <i>The Plant Cell Online</i> 24, 507-18. |
| Leaf senescence | NOL     | NYC1-LIKE                                    | AT5G04900 | c5 | 1434774  | c5_01434 | Nakajima S, Ito H, Tanaka R and Tanaka A. 2012. Chlorophyll b reductase plays an essential role in maturation and storability of Arabidopsis seeds. <i>Plant Physiology</i> 160, 261-73.                                                                                                                           |
| Leaf senescence | ANAC083 | NAC DOMAIN CONTAINING PROTEIN 83             | AT5G13180 | c5 | 4196572  | c5_04196 | Seo PJ and Park C-M. 2011. Signaling linkage between environmental stress resistance and leaf senescence in Arabidopsis. <i>Plant signaling &amp; behavior</i> 6, 1564-66.                                                                                                                                         |
| Leaf senescence | PPH     | PHEOPHYTINASE                                | AT5G13800 | c5 | 4451837  | c5_04451 | Schelbert S, Aubry S, Burla B, Agne B, Kessler F, Krupinska K and Hörtensteiner S. 2009. Pheophytin Pheophorbide Hydrolase (Pheophytinase) Is Involved in Chlorophyll Breakdown during Leaf Senescence in Arabidopsis. <i>The Plant Cell Online</i> 21, 767-85.                                                    |
| Leaf senescence | YUC6    | YUCCA6                                       | AT5G25620 | c5 | 8935040  | c5_08935 | Kim JI, Murphy AS, Baek D, Lee S-W, Yun D-J, Bressan RA and Narasimhan ML. 2011. YUCCA6 over-expression demonstrates auxin function in delaying leaf senescence in Arabidopsis thaliana. <i>Journal of experimental botany</i> 62, 3981-92.                                                                        |
| Leaf senescence | MIR164c | MICRORNA164C                                 | AT5G27807 | c5 | 9852664  | c5_09852 | Hasson A, Plessis A, Blein T, Adroher B, Grigg S, Tsiantis M, Boudaoud A, Damerval C and Laufs P. 2011. Evolution and Diverse Roles of the CUP-SHAPED COTYLEDON Genes in Arabidopsis Leaf Development. <i>The Plant Cell Online</i> 23, 54-68.                                                                     |
| Leaf senescence | THI2.2  | THIONIN 2.2                                  | AT5G36910 | c5 | 14561817 | c5_14561 | Epple P, Apel K and Bohlmann H. 1995. An Arabidopsis thaliana Thionin Gene Is Inducible via a Signal Transduction Pathway Different from That for Pathogenesis-Related Proteins. <i>Plant Physiology</i> 109, 813-20.                                                                                              |
| Leaf senescence | ANAC092 | ARABIDOPSIS NAC DOMAIN CONTAINING PROTEIN 92 | AT5G39610 | c5 | 15858400 | c5_15858 | Balazadeh S, Kwasniewski M, Caldana C, Mehrnia M, Zanon MI, Xue G-P and Mueller-Roeber B. 2011. ORS1, an H2O2-Responsive NAC Transcription Factor, Controls Senescence in Arabidopsis thaliana. <i>Molecular Plant</i> 4, 346-60.                                                                                  |
| Leaf senescence | LHT1    | LYSINE HISTIDINE TRANSPORTER 1               | AT5G40780 | c5 | 16323651 | c5_16323 | Liu G, Ji Y, Bhuiyan NH, Pilot G, Selvaraj G, Zou J and Wei Y. 2010. Amino Acid Homeostasis Modulates Salicylic Acid-Associated Redox Status and Defense Responses in Arabidopsis. <i>The Plant Cell Online</i> 22, 3845-63.                                                                                       |
| Leaf senescence | SAG12   | SENESCENCE-ASSOCIATED GENE 12                | AT5G45890 | c5 | 18613259 | c5_18613 | Lohman KN, Gan S, John MC and Amasino RM. 1994. Molecular analysis of natural leaf senescence in Arabidopsis thaliana. <i>Physiologia Plantarum</i> 92, 322-28.                                                                                                                                                    |
| Leaf senescence | SAG113  | SENESCENCE ASSOCIATED GENE 113               | AT5G59220 | c5 | 23894404 | c5_23894 | Zhang K, Xia X, Zhang Y and Gan S-S. 2012. An ABA-regulated and Golgi-localized protein phosphatase controls water loss during leaf senescence in Arabidopsis. <i>The Plant Journal</i> 69, 667-78.                                                                                                                |
| Leaf senescence | ANAC100 | NAC DOMAIN CONTAINING PROTEIN 100            | AT5G61430 | c5 | 24701122 | c5_24701 | Guo H-S, Xie Q, Fei J-F and Chua N-H. 2005. MicroRNA Directs mRNA Cleavage of the Transcription Factor NAC1 to Downregulate Auxin Signals for Arabidopsis Lateral Root Development. <i>The Plant Cell Online</i> 17, 1376-86.                                                                                      |
| Leaf senescence | CPR5    | CONSTITUTIVE EXPRESSION OF PR GENES 5        | AT5G64930 | c5 | 25945712 | c5_25945 | Jing HC, Hebel R, Oeljeklaus S et al. 2008. Early leaf senescence is associated with an altered cellular redox balance in Arabidopsis cpr5/old1 mutants. <i>Plant Biology</i> 10, 85-98.                                                                                                                           |
| Flowering time  | CRY2    | CRYPTOCHROME 2                               | AT1G04400 | c1 | 1185550  | c1_01185 | Guo H, Yang H, Mockler TC and Lin C. 1998. Regulation of flowering time by Arabidopsis photoreceptors. <i>Science</i> 279, 1360-63.                                                                                                                                                                                |
| Flowering time  | GI      | GIGANTEA                                     | AT1G22770 | c1 | 8061844  | c1_08061 | Levy YY and Dean C. 1998. The Transition to Flowering. <i>The Plant Cell Online</i> 10, 1973-89.                                                                                                                                                                                                                   |
| Flowering time  | FT      | FLOWERING LOCUS T                            | AT1G65480 | c1 | 24331428 | c1_24331 | Kardailsky I, Shukla VK, Ahn JH, Dagenais N, Christensen SK, Nguyen JT, Chory J, Harrison MJ and Weigel D. 1999. Activation tagging of the floral inducer FT. <i>Science</i> 286, 1962-65.                                                                                                                         |
| Flowering time  | FLM     | FLOWERING LOCUS M                            | AT1G77080 | c1 | 28955637 | c1_28955 | Levy YY and Dean C. 1998. The Transition to Flowering. <i>The Plant Cell Online</i> 10, 1973-89.                                                                                                                                                                                                                   |
| Flowering time  | FRI     | FRIGIDA                                      | AT4G00650 | c4 | 269026   | c4_00269 | Clarke JH and Dean C. 1994. Mapping FRI, a locus controlling flowering time and vernalization response in Arabidopsis thaliana. <i>Mol. Gen. Genet.</i> 242, 81-89.                                                                                                                                                |
| Flowering time  | TFL1    | TERMINAL FLOWER 1                            | AT5G03840 | c5 | 1024641  | c5_01024 | Shannon S and Meeks-Wagner DR. 1991. A mutation in the Arabidopsis TFL1 gene affects inflorescence meristem development. <i>Plant Cell</i> 3, 877-92.                                                                                                                                                              |
| Flowering time  | FLC     | FLOWERING LOCUS C                            | AT5G10140 | c5 | 3173497  | c5_03173 | Bastow R, Mylne JS, Lister C, Lippman Z, Martienssen RA and Dean C. 2004. Vernalization requires epigenetic silencing of FLC by histone methylation. <i>Nature</i> 427, 164-67.                                                                                                                                    |
| Flowering time  | MAF2    | MADS AFFECTING FLOWERING 2                   | AT5G65050 | c5 | 25982254 | c5_25982 | Caicedo AL, Richards C, Ehrenreich IM and Purugganan MD. 2009. Complex rearrangements lead to novel chimeric gene fusion polymorphisms at the Arabidopsis thaliana MAF2-5 flowering time gene cluster. <i>Molecular Biology and Evolution</i> 26, 699-711.                                                         |
| Flowering time  | MAF3    | MADS AFFECTING FLOWERING 3                   | AT5G65060 | c5 | 25987429 | c5_25987 | Caicedo AL, Richards C, Ehrenreich IM and Purugganan MD. 2009. Complex rearrangements lead to novel chimeric gene fusion polymorphisms at the Arabidopsis thaliana MAF2-5 flowering time gene cluster. <i>Molecular Biology and Evolution</i> 26, 699-711.                                                         |
| Flowering time  | MAF4    | MADS AFFECTING FLOWERING 4                   | AT5G65070 | c5 | 25992243 | c5_25992 | Caicedo AL, Richards C, Ehrenreich IM and Purugganan MD. 2009. Complex rearrangements lead to novel chimeric gene fusion polymorphisms at the Arabidopsis thaliana MAF2-5 flowering time gene cluster. <i>Molecular Biology and Evolution</i> 26, 699-711.                                                         |

Flowering time

MAF5

MADS AFFECTING FLOWERING 5

AT5G65080

c5

25997504

c5\_25997

Caicedo AL, Richards C, Ehrenreich IM and Purugganan MD. 2009. Complex rearrangements lead to novel chimeric gene fusion polymorphisms at the *Arabidopsis thaliana* MAF2-5 flowering time gene cluster. *Molecular Biology and Evolution* 26, 699-711.
